# Supplementary material for: The IDA/IDA-LIKE and PIP/PIP-LIKE gene families in Arabidopsis: phylogenetic relationship, expression patterns, and transcriptional effect of the PIPL3 peptide
Source: PubMed Central journal article supplement (PMC4526919; doi:10.1093/jxb/erv285), 2015-06-10
Supplement: supp_erv285_jexbot148056_file003.pdf [file supp_erv285_jexbot148056_file003.pdf]

**The IDA/IDA-LIKE and PIP/PIP-LIKE gene families in  
Arabidopsis: phylogenetic relationship, expression patterns  
and transcriptional effect of the PIPL3 peptide**

Ane Kjersti Vie, Javad Najafi, Bin Liu, Per Winge, Melinka A.  
Butenko, Karina S. Hornslien, Robert Kumpf, Reidunn B. Aalen,  
Atle M. Bones and Tore Brembu

**Supplementary Data**

Figs S1-S6  
Table S1-S3  
Dataset S1

# Supplementary Figure S1

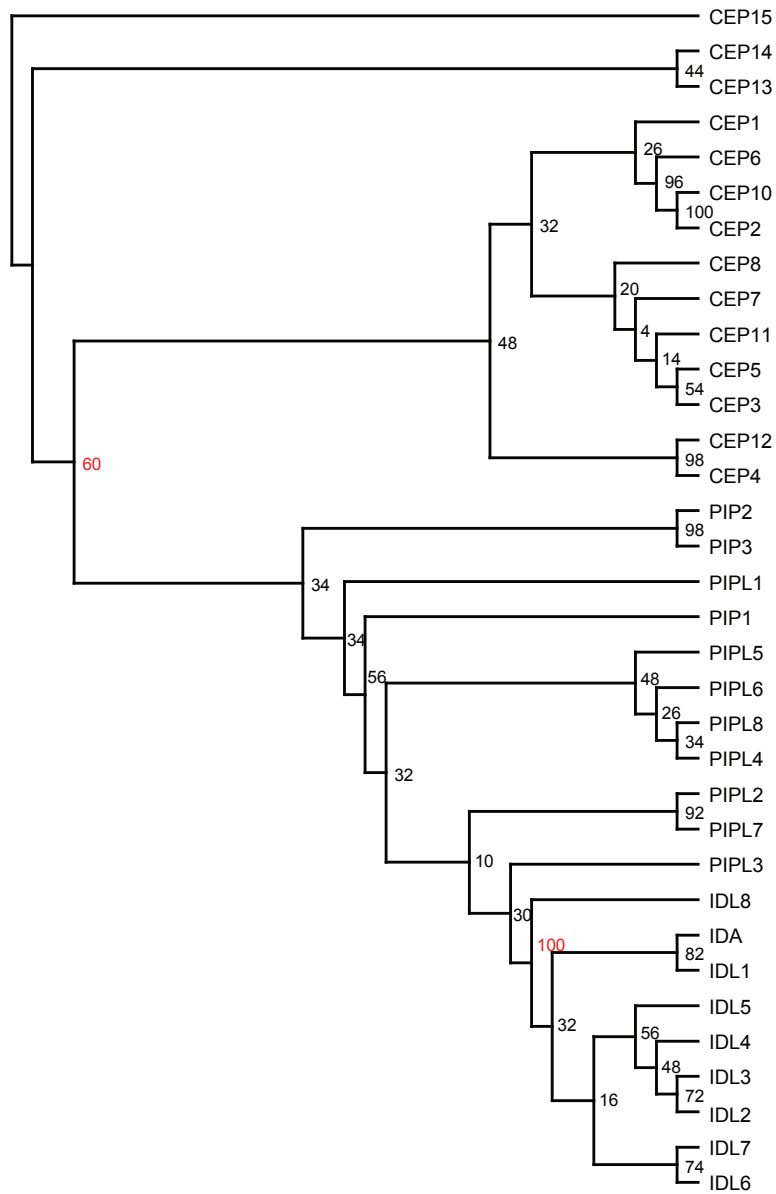

Supplementary Figure S1. Maximum Likelihood (ML) tree constructed based on a full-length protein alignment of the Arabidopsis IDA/IDL, PIP/PIPL and CEP families. CEP15 was used as an outgroup. CEP9 was not included, due to its aberrant length (229 AAs) and number of peptide motifs (five). Bootstrap confidence values are shown in percentage. Nodes discussed in the text are shown in red.

# Supplementary Figure S2

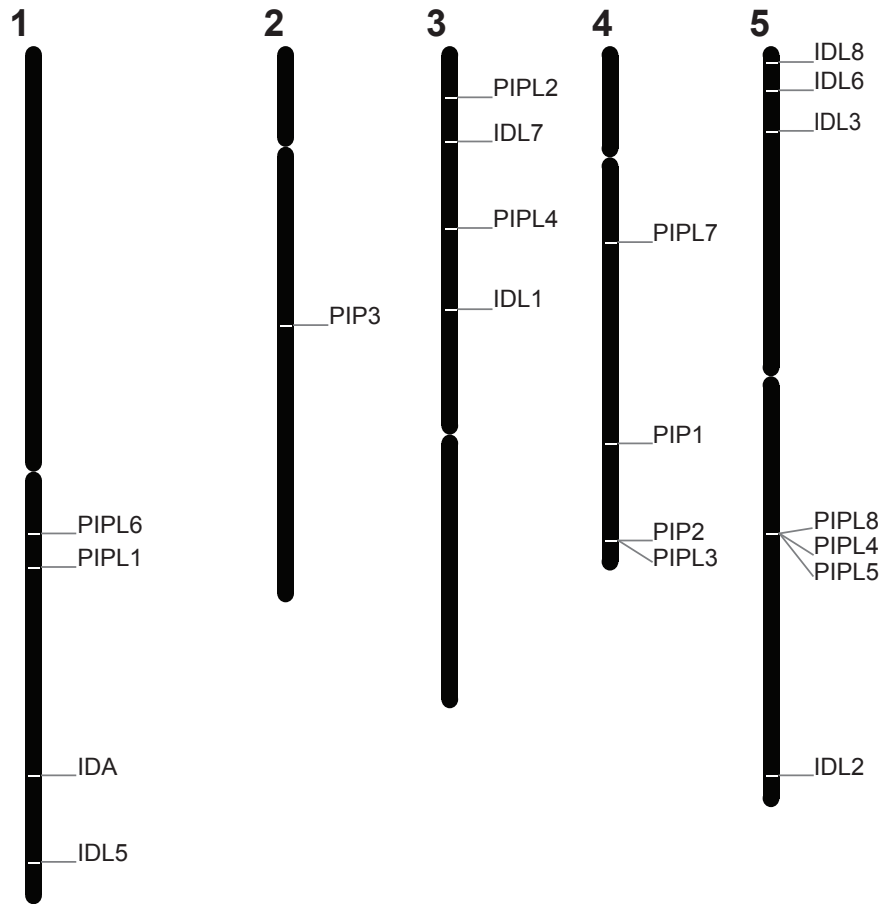

Supplementary Figure S2. Chromosomal localisation of *IDA/IDL* and *PIP/PIPL* genes in *Arabidopsis*. The chromosome number is indicated above each chromosome.

# Supplementary Figure S3

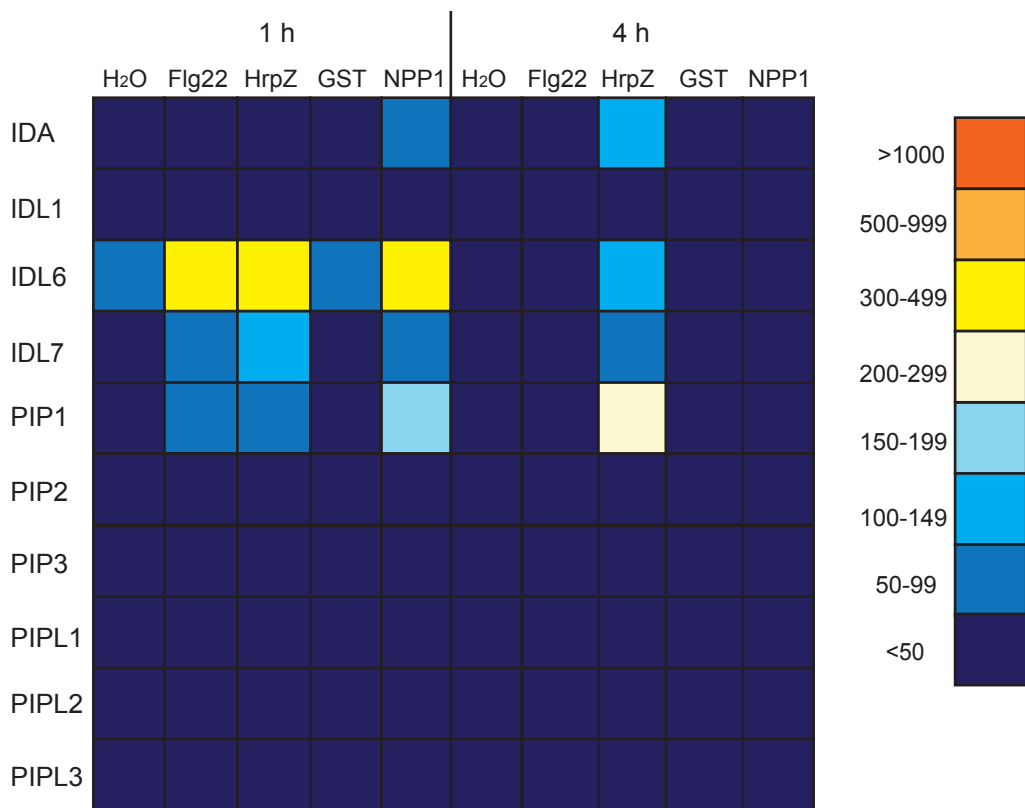

Supplementary Figure S3. Elicitor-induced expression of *IDA/IDL* and *PIP/PIPL* genes based on *in silico* data.

H<sub>2</sub>O, Control plants treated with water; Flg22; flagellin22 (*Pseudomonas syringae* derived elicitor); HrpZ, HrpZ hairpin (*Pseudomonas syringae* derived elicitor); GST, Control plants treated with Gluthatione S-transferase (GST) tag; NPP1, Necrotic-inducing Phytophthora protein 1, GST-tagged (*Phytophthora infestans* derived elicitor). All data was obtained from the Arabidopsis eFP browser at the Bio-Array Resource database (Winter et al., 2007). The arithmetic expression values are given next to the colour scale.

# Supplementary Figure S4

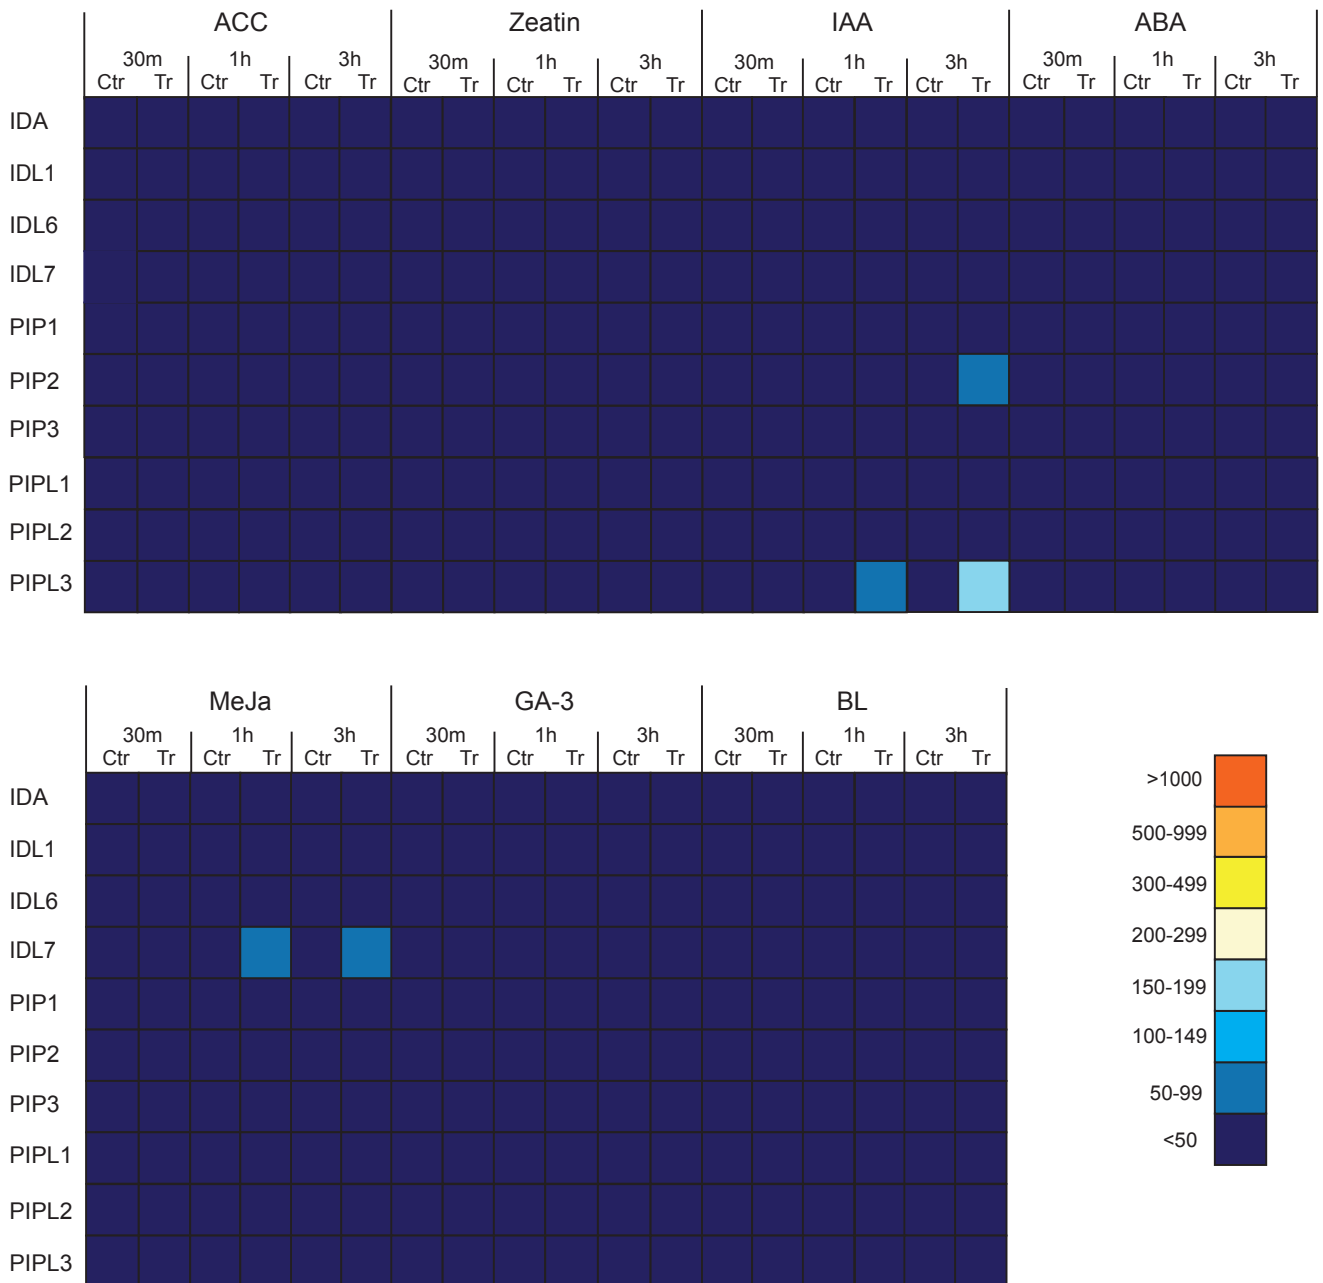

Supplementary Figure S4. Hormone-induced expression of *IDA/IDL* and *PIP/PIPL* genes based on *in silico* data. ACC, 1-aminocyclopropane-l-carboxylic acid; ABA, abscisic acid; BL, brassinolide; GA-3, gibberellin A3; IAA, indole-3-acetic acid; MeJa, methyl jasmonate. All data was obtained from the Arabidopsis eFP browser at the Bio-Array Resource database (Winter et al., 2007). The arithmetic expression values are given next to the colour scale.

# Supplementary Figure S5

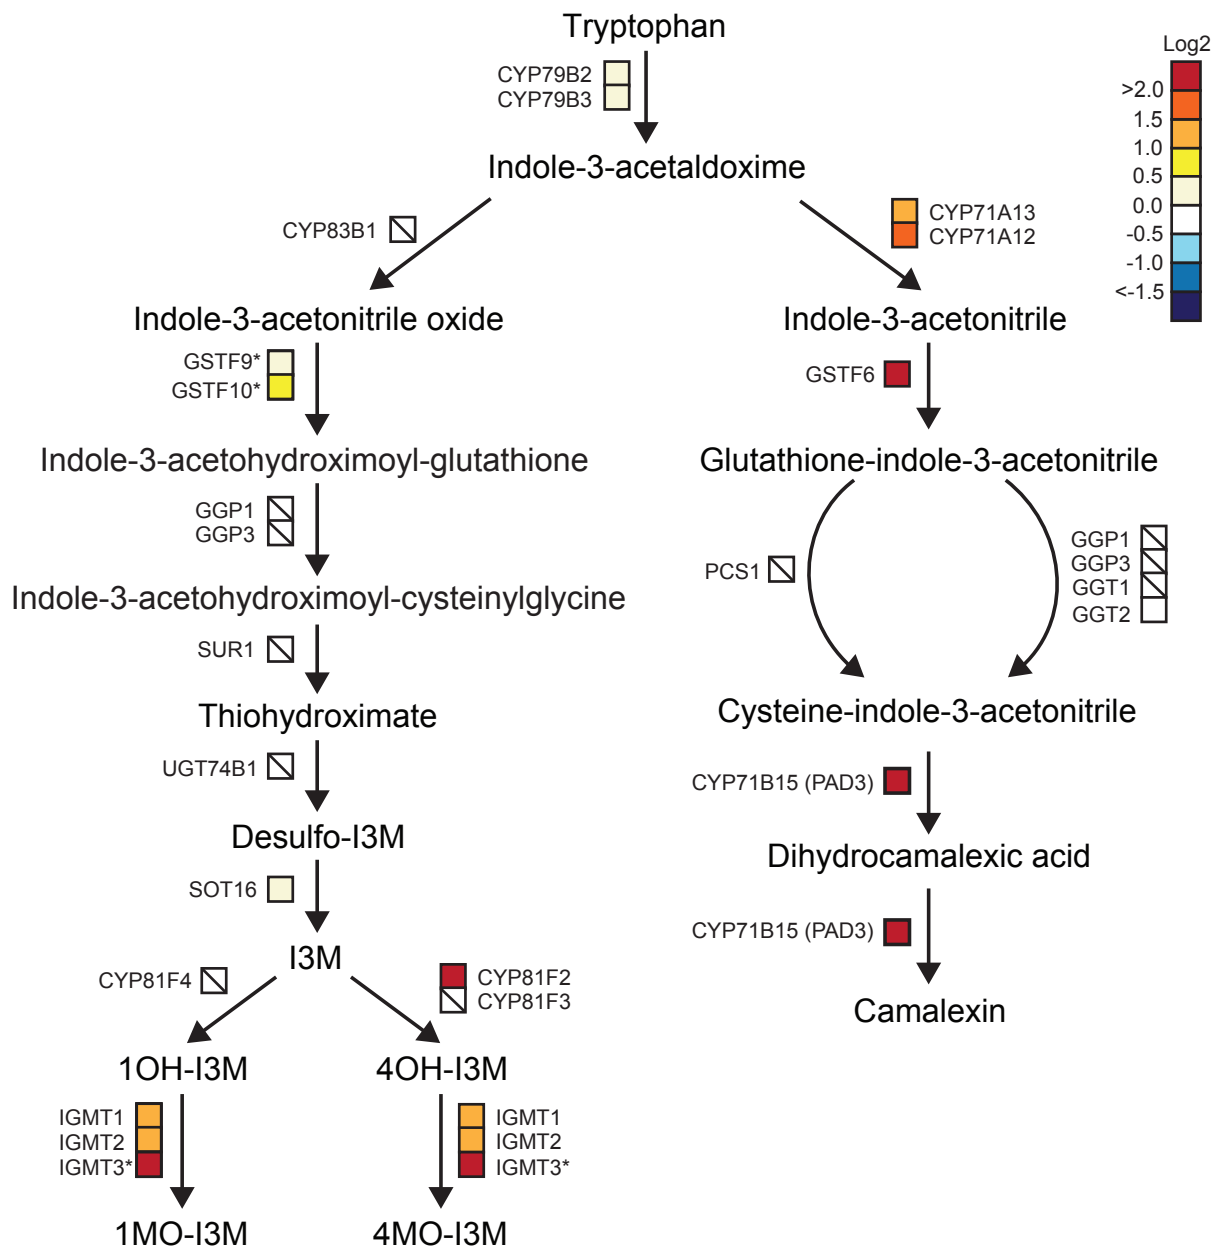

Supplementary Figure S5. Transcriptional activation of the camalexin and indole glucosinolate biosynthetic pathways by PIPL3 peptide treatment. Squares with a diagonal line inside indicate genes that are not significantly regulated. The scale on the right represents gene expression ratio values, log<sub>2</sub> transformed. 1MO-I3M, 1-methoxy-indole-3-ylmethyl glucosinolate; 1OH-I3M, 1-hydroxy-indol-3-yl-methyl-glucosinolate; 4MO-I3M, 4-methoxy-indol-3-ylmethyl glucosinolate; 4OH-I3M, 4-hydroxy-indole-3-ylmethyl-glucosinolate; I3M, indol-3-ylmethyl glucosinolate. Asterisks indicate predicted enzymes. The figure is adapted from S nderby et al., 2010 and Ahuja et al., 2012.

# Supplementary Figure S6

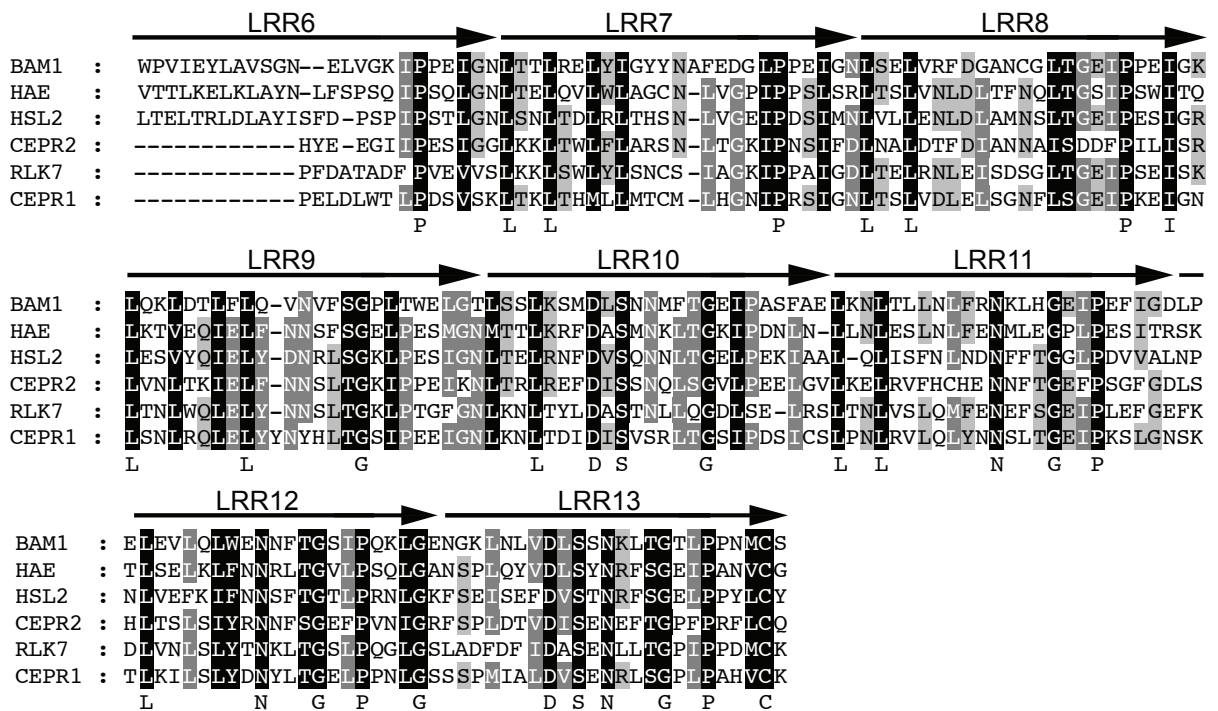

Supplementary Figure S6. IDA, PIP1 and CEP1 bind related receptors. Protein alignment of a central part of the ectodomains of the receptors showing the LRRs 6-13. Repeats 6-8 of BAM1 has been shown to be involved in the binding of CLE9 (Shinohara *et al.*, 2012). Amino acids in black are conserved in all sequences, consensus amino acids are shown below the alignment.

**Supplementary Table S1. List of primers used in this study.**

| Gene       | AtID                   | Primer       | Sequence                     |
|------------|------------------------|--------------|------------------------------|
| IDA        | At1g68765              | qIDAF        | CAATGGCTCCGTGTCGT            |
|            |                        | qIDAR        | TCAATGAGGAAGAGAGTTAACAAAAGAG |
| IDL1       | At3g25655              | qIDL1F       | AAAATCCAAAATTTATAAAACCCTAGC  |
|            |                        | qIDL1R       | AAACATGGTTTTATGAGAAAGATTCA   |
| IDL2       | At5g64667              | qIDL2F       | ATTCAGCAATCTCCTTTTTCCC       |
|            |                        | qIDL2R       | TTTGTGGAAGGGTTTTGGTGA        |
| IDL3       | At5g09805              | qIDL3F       | CCTGCCACGTCAGTTTCC           |
|            |                        | qIDL3R       | CCGATTTGTTATGTTTTCTGG        |
| IDL4       | At3g18715              | qIDL4F       | GCGGAGAGGCCATTTCTTA          |
|            |                        | qIDL4R       | AGGAGCAGAAGCTGGAACAG         |
| IDL5       | At1g76952              | qIDL5F       | TCAGGATTTTTGCCCAAGAC         |
|            |                        | qIDL5R       | GCTCGACCTTGAGTTGGTTCT        |
| IDL6       | At5g05300              | qIDL6F       | TGCTTCGTTCTCAACAGCTAGG       |
|            |                        | qIDL6R       | GAATATCCAGCCGTCAAGTGAT       |
| IDL7       | At3g10930              | qIDL7F       | CCGGAGAGTTTGTCCAGTCAT        |
|            |                        | qIDL7R       | CGTTAGTTTTCTTGCTGGGTCC       |
| IDL8       | At5g02591 <sup>a</sup> | qIDL8F       | ATAAACCAACCATCTTCGGCTT       |
|            |                        | qIDL8R       | ACGAGTATCATAACGATCTAGG       |
| PIP1       | At4g28460              | qPIP1F       | CGATGAGAAGAGTTAGTTGGTC       |
|            |                        | qPIP1R       | GGAACCACCACGTGTTCTACGA       |
| PIP2       | At4g37290              | qPIP2F       | TTAAAGTGCCCATACCCATCTA       |
|            |                        | qPIP2R       | TCTTCTATGTATCGATCAGAA        |
| PIP3       | At2g23270              | qPIP3F       | GACTGAGACGCTTGAATATGGT       |
|            |                        | qPIP3R       | AAGCAGCCACATTAAGTGGTTC       |
| PIPL1      | At1g49800              | qPIPL1F      | GTCAAGGATAGTTCGAGATCGT       |
|            |                        | qPIPL1R      | GACTGTTTCACTGTGGCTAACA       |
| PIPL2      | At3g06090              | qPIPL2F      | CATGGTTGTAACAGGGTTGCAG       |
|            |                        | qPIPL2R      | TTCGACCTGACCACAAATTCGC       |
| PIPL3      | At4g37295              | qPIPL3F      | ATGCATACAATGGCTTCAGGAC       |
|            |                        | qPIPL3R      | GATTCTATGACCTGAGCTAAAC       |
| PIPL4      | At5g43066              | qPIPL4F      | GGAGCCTTTCAGAGATATCAAC       |
|            |                        | qPIPL4R      | CAGACGCTAGAATCCTCATCAA       |
| PIPL5      | At5g43068 <sup>a</sup> | qPIPL5F      | CTCTACGATCAAAGGCGTTGAG       |
|            |                        | qPIPL5R      | TCTTCCCCAAAGGACGTTGACT       |
| PIPL6      | At1g47178 <sup>a</sup> | qPIPL6F      | CTAATCAGAGGCTTAGTACTG        |
|            |                        | qPIPL6R      | ATGTATAACGACTTGTGCAAAC       |
| PIPL7      | At5g43066 <sup>a</sup> | qPIPL7F      | GTACCATATCGTGGTTGTGACG       |
|            |                        | qPIPL7R      | CGACTCGGACCAGAACTAACT        |
| PIPL8      | At4g11403 <sup>a</sup> | qPIPL8F      | TTGAGGGTGGTCATTGCAGAAC       |
|            |                        | qPIPL8R      | GTTGGTATCTCTGAACGGCTTC       |
| Cyp71A13   | At2g30770              | qCYP71A13F   | TAAAGAGGTGCTTCGGTTGC         |
|            |                        | qCYP71A13R   | TATCGCAGTGTCTCGTTGGA         |
| TIP41-LIKE | At4g34270              | qTIP41-likeF | GTGAAAAGTGTGGAGAGAAGCAA      |
|            |                        | qTIP41-likeR | TCAACTGGATACCCTTTCGCA        |

<sup>a</sup>Preliminary AtID from Tair.



**Supplementary Table S2. Gene duplication events of the *IDA/IDL* and *PIP/PIPL* gene families.** The 40 nearest protein coding genes flanking each of the *IDA/IDL/PIP/PIPL* gene loci were analysed for other closely related genes located next to the *IDA* and *PIP/PIPL* genes by Blast searches. Each number represents common genes flanking the *IDA/IDL/PIP/PIPL* loci.

|                                      | <i>IDA</i> | <i>IDL1</i> | <i>IDL2</i> | <i>IDL3</i> | <i>IDL4</i> | <i>IDL5</i> | <i>IDL6</i> | <i>IDL7</i> | <i>IDL8</i> | <i>PIP1</i> | <i>PIPL6</i> | <i>PIPL5-PIPL4-PIPL8<sup>a</sup></i> | <i>PIPL2</i> | <i>PIPL7</i> | <i>PIPL3-PIP2<sup>a</sup></i> | <i>PIP2</i> | <i>PIPL1</i> |
|--------------------------------------|------------|-------------|-------------|-------------|-------------|-------------|-------------|-------------|-------------|-------------|--------------|--------------------------------------|--------------|--------------|-------------------------------|-------------|--------------|
| <i>IDA</i>                           | 0          | 7           | 0           | 0           | 0           | 0           | 0           | 0           | 0           | 1           | 0            | 0                                    | 1            | 0            | 0                             | 0           | 0            |
| <i>IDL1</i>                          | 7          | 0           | 0           | 0           | 0           | 0           | 0           | 0           | 0           | 1           | 0            | 0                                    | 0            | 0            | 0                             | 0           | 0            |
| <i>IDL2</i>                          | 0          | 0           | 0           | 14          | 1           | 0           | 1           | 0           | 0           | 0           | 1            | 0                                    | 0            | 0            | 1                             | 0           | 0            |
| <i>IDL3</i>                          | 0          | 0           | 15          | 0           | 1           | 0           | 1           | 1           | 0           | 0           | 0            | 0                                    | 0            | 0            | 1                             | 0           | 0            |
| <i>IDL4</i>                          | 2          | 2           | 1           | 3           | 0           | 0           | 1           | 0           | 0           | 0           | 0            | 0                                    | 0            | 1            | 0                             | 0           | 0            |
| <i>IDL5</i>                          | 0          | 0           | 0           | 0           | 0           | 0           | 0           | 0           | 0           | 0           | 0            | 0                                    | 0            | 0            | 0                             | 0           | 0            |
| <i>IDL6</i>                          | 0          | 0           | 0           | 0           | 2           | 0           | 0           | 6           | 0           | 0           | 0            | 0                                    | 1            | 0            | 0                             | 0           | 0            |
| <i>IDL7</i>                          | 0          | 0           | 0           | 1           | 0           | 0           | 6           | 0           | 0           | 0           | 0            | 0                                    | 0            | 1            | 0                             | 0           | 0            |
| <i>IDL8</i>                          | 0          | 0           | 0           | 0           | 0           | 0           | 0           | 0           | 0           | 0           | 0            | 0                                    | 0            | 1            | 0                             | 0           | 0            |
| <i>PIP1</i>                          | 0          | 1           | 2           | 1           | 0           | 0           | 0           | 2           | 0           | 0           | 0            | 0                                    | 0            | 0            | 0                             | 0           | 0            |
| <i>PIPL6</i>                         | 0          | 0           | 1           | 0           | 0           | 0           | 0           | 0           | 0           | 0           | 0            | 5                                    | 0            | 0            | 0                             | 2           | 0            |
| <i>PIPL5-PIPL4-PIPL8<sup>a</sup></i> | 0          | 0           | 1           | 1           | 0           | 0           | 0           | 0           | 0           | 0           | 5            | 0                                    | 0            | 0            | 0                             | 0           | 1            |
| <i>PIPL2</i>                         | 0          | 0           | 0           | 0           | 0           | 0           | 0           | 0           | 0           | 0           | 0            | 0                                    | 0            | 0            | 0                             | 0           | 0            |
| <i>PIPL7</i>                         | 0          | 0           | 0           | 0           | 0           | 0           | 0           | 1           | 0           | 0           | 2            | 2                                    | 0            | 0            | 0                             | 0           | 0            |
| <i>PIPL3-PIP2<sup>a</sup></i>        | 1          | 0           | 1           | 1           | 0           | 0           | 0           | 0           | 0           | 0           | 0            | 0                                    | 0            | 0            | 0                             | 4           | 0            |
| <i>PIP2</i>                          | 0          | 0           | 0           | 0           | 0           | 0           | 0           | 0           | 0           | 0           | 2            | 0                                    | 0            | 0            | 8                             | 0           | 1            |
| <i>PIPL1</i>                         | 0          | 0           | 0           | 0           | 0           | 0           | 0           | 0           | 1           | 0           | 0            | 0                                    | 0            | 0            | 0                             | 1           | 0            |

<sup>a</sup> *PIPL4*, *PIPL5* and *PIPL8* are localised next to each other on chromosome 5 and are therefore treated as one locus. The same is the situation for *PIPL3* and *PIP2* on chromosome 4

**Supplementary Table S3. Expression of *IDA* and the *IDL1* to *IDL5* genes fourteen days after germination.** Presence of a GUS signal in different tissues of the developing seedling.

(-) indicates no *GUS* expression, the location of the GUS signal is indicated by tissue.

|                    | <b>Cotyledons</b> | <b>Roots</b>     | <b>Hypocotyl</b> | <b>Stomata</b> | <b>Shoot apical meristem</b> |
|--------------------|-------------------|------------------|------------------|----------------|------------------------------|
| <b><i>IDA</i></b>  | -                 | cortex/epidermis | -                | -              | -                            |
| <b><i>IDL1</i></b> | vascular          | columella        | -                | -              | +                            |
| <b><i>IDL2</i></b> | vascular          | vascular         | -                | +              | +                            |
| <b><i>IDL3</i></b> | vascular          | vascular         | vascular         | +              | +                            |
| <b><i>IDL4</i></b> | vascular          | vascular         | vascular         | -              | +                            |
| <b><i>IDL5</i></b> | -                 | -                | -                | -              | -                            |

Supplementary Dataset 1. Protein sequences of IDA family members in Arabidopsis.

<sup>a</sup>Preliminary AtID from TAIR

>IDA\_ At1g68765

MAPCRTMMVLLCFVLFLAASSSCVAAARIGATMEMKKNIKRLTFKNSHIFGY  
LPKGVPIPPSAPSKRHNSFVNSLPH

>IDL1\_ At3g25655

MNLSHKTMFMTLYIVFLLIFGSYNATARIGPIKLSETEIVQTRSRQEIIIGGFTFK  
GRVFHSFSKRVLVPPSGPSMRHNSVVNNLKH

>IDL2\_ At5g64667

MSSRNQSRITSSFFVSFFTRTILLLLILLGFCNGARTNTNVFNSKPHKKHND  
AVSSSTKQFLGFLPRHFPVPASGPSRKHNDIGLLSWHRSSP

>IDL3\_ At5g09805

MSSRSHRSRKYQLTRTIPILVLLLVLLSCCNGARTTNVFNTSSPPKQKDVVSP  
HDHVHHQVQDHKSVQFLGSLPRQFPVPTSGPSRKHNEIGLSSTKT

>IDL4\_ At3g18715

MYPTRPHYWRRRLSINRPQAFLLILCLFFIHHCDASRFSSSSVFYRNPNYDHS  
NNTVRRGHFLGFLPRHLPVPASAPSRKHNDIGIQALLSP

>IDL5\_ At1g76952

MGNKRIKAMMILVVMIMMVFSWRICEADSLRRYSSSSRPQRFFKVRPNPRN  
HHHQNQGFNGDDYPPESFSGFLPKTLPIPHSAPSRKHNVYGLQSTNSHRCP

>IDL6\_ At5g05300

MARIGALILVLFISISQLASFSTARKFPVVGIPSVIDGVIFSGEISAVSKKVTVVGC  
EGEDDHLTAGYSSYITGKFGSLVLNALPKGSVPASGPSKRINDVKT

>IDL7\_ At3g10930

MAINRSLLLILLFISVSLSTARILPGEFVPVIFSGEIPPVSKSAVVGCGGEQETKT  
EYSSFVPEVVAGKFGSLVLNALPKGSRPGSGPSKKTNDVKT

>IDL8\_ At5g02591<sup>a</sup>

MAKSTYVLVVISFGLLFACVIGTTQDETSRLLWSRPWARGLADSPQDPHKPT  
IFGLKPWSPSQRLIFRMLPKNVPIPPSGPSRKETPPSPPRS

>PIP1\_ At4g28460

MRRVSWSTVLIVVVMVSLFFVEHVVPAAAGRVLTEKSGDGSATMTVEKM  
KSTVDSWFQRLASGPSRGRGH

>PIP2\_ At4g37290

MMMNKNVLSSILFFMLIGSVLVESRPLGLTKTEEFVASFDFGLSLGSIKDSGP  
SPGEGHKVVDKDTFRFVKHSGPSPSGPGH

>PIP3\_ At2g23270

MMMNKVVLSLFFMLVSSNFVVEARPLGLTKAEENLVAKFFDGLSLGAIKE  
SGPSSGGEGHRFVDRTELEYGKHSGPSTSGPGH

>PIPL1\_ At1g49800

MVMAKNLTKFYVFLVVLMMVVSLLLAIEGRPVKDSSRSLTQMRDSSMFNG  
SVIMSSFKPVESVVDLSWLATVKQSGPSPGVGHHRAKGYKMFGRANDSGPS  
PGVGH

>PIPL2\_ At3g06090

MKMKKLLKVFLVAYLTCSIAMASYHGNCNRVAEKATRMNVVGEDSRNEF  
GNYEEKKKKANLWSGRKLASGPSRRGCGH

>PIPL3\_ At4g37295

MRPVGLIFTVMFLVSAFSESRTADCRVLLGGSTEEIDQSKIHGVDLRSEDLLG  
VVIHGYYKLRWLSSAGERMHTMASGPSRRGAGH

>PIPL4\_ At5g43066

MEKKNMFVLCMILLVGSLSMFERVDCRVVRSEPFDRDINGHDQSTATKVKRS  
SCSRRPLMRILASGPNKRGRGH

>PIPL5\_ At5g43068<sup>a</sup>

MEKKNVFLLFVIFLLVGSSLMFERVDCRALRSKALRDIKGHQSSVIMKVKN  
NSTSQRPLGKSFAYRLASGPSRRGRGH

>PIPL6\_ At1g47178<sup>a</sup>

MEKKLMILLCIIFLVEVFSILGGVDCRALRTQTTGCDQTTGCDQTTATVESGG  
FGVFSGAANGSRDHLLMRSALAFRLASGPSRKGRGH

>PIPL7\_ At4g11402<sup>a</sup>

MEMKTLLKVMFFLFSYLSTFSLAMVPYRGCDVIGVDLGDGSGNYGKGVSKG  
FLSGRKLVSGPSRSSCGH

>PIPL8\_ At5g43064<sup>a</sup>

MENKNVFLVCVILFLVSSSLMFEGGHCTRLRSKPFRDTNGHDQSSATMKVKH  
SSESAFRLASGSSRRGRGH
